# Supplementary material
Source: Springer Nature journal article supplement (https://www.springermedizin.de/resource/supplementary/12889_2013_6050_MOESM4_ESM.docx/9494172)
Supplement: MOESM4 [file 9494172]

**Table 2: Univariate and multivariate predictors for AL co-prescribed with antibiotics**

| **Variable** | |  | **Univariate** | | | | |  | **Multivariate** | | | | |
| --- | --- | --- | --- | --- | --- | --- | --- | --- | --- | --- | --- | --- | --- |
|  |  | | | | |  | | | | |
|  | **Odds ratio** |  | **95% CI** |  | **P - value** |  | **Odds ratio** |  | **95% CI** |  | **P - value** |
|  | |  |  |  |  |  |  |  |  |  |  |  |  |
| Age group | |  |  |  |  |  |  |  |  |  |  |  |  |
|  | < 5 years |  | Referent | | | | | | | | | | |
|  | 5 + years |  | 0.63 |  | 0.47 - 0.84 |  | 0.007 |  | 0.63 |  | 0.46 - 0.85 |  | 0.009 |
| Sex | |  |  |  |  |  |  |  |  |  |  |  |  |
|  | Male |  | Referent | | | | | | | | | | |
|  | Female |  | 1.02 |  | 0.91 - 1.145 |  | 0.674 |  | 1.09 |  | 0.98 - 1.20 |  | 0.087 |
| Temperature range | |  |  |  |  |  |  |  |  |  |  |  |  |
|  | < 38.5oC |  | Referent | | | | | | | | | | |
|  | ≥38.5oC |  | 0.91 |  | 0.71 - 1.16 |  | 0.381 |  | 0.85 |  | 0.64 - 1.12 |  | 0.204 |
| Season | |  |  |  |  |  |  |  |  |  |  |  |  |
|  | Low transmission |  | Referent | | | | | | | | | | |
|  | High transmission |  | 1.16 |  | 0.72 - 1.87 |  | 0.49 |  | 1.20 |  | 0.71 - 0.05 |  | 0.441 |
| Facility type | |  |  |  |  |  |  |  |  |  |  |  |  |
|  | Health Centre |  | Referent | | | | | | | | | | |
|  | Dispensary |  | 1.45 |  | 0.84 - 2.50 |  | 0.156 |  | 1.39 |  | 0.84 - 2.30 |  | 0.164 |
| Malaria test results | |  |  |  |  |  |  |  |  |  |  |  |  |
|  | Positive |  | Referent | | | | | | | | | | |
|  | Negative |  | 2.12 |  | 1.34 - 3.34 |  | 0.006 |  | 2.21 |  | 1.65 - 2.97 |  | 0.001 |
|  | Not tested |  | 1.14 |  | 0.82 - 1.57 |  | 0.383 |  | 1.03 |  | 0.69 - 1.54 |  | 0.859 |
